# Supplementary material for: Renal outcomes according to renal replacement therapy modality and treatment protocol in the ATN and RENAL trials
Source: Springer Nature journal article supplement (doi:10.1186/s13054-022-04151-5), 2022-09-06

**Renal Replacement Therapy Dependence  
in Critically Ill Patients According to  
Continuous or Intermittent Renal  
Replacement Therapy**

**ONLINE SUPPLEMENT**

## eMETHODS

### *Sensitivity analysis*

For all analysis below (considering the weighted regressions), the renal replacement therapy dependence at day 28 was assessed using a cause-specific hazard model, with the dependence at day 28 as the event of interest.

### *Inverse probability of treatment weighting*

In this method, the treatment effect is estimated in a population whose distribution of risk factors is equal to that found in all study subjects. The calculation of the IPTW (*inverse probability of treatment weighted*)

was done according to Eq. 1.<sup>1</sup>

$$IPTW_T = \frac{1}{\hat{e}(X)} ; IPTW_{UN} = \frac{1}{1 - \hat{e}(X)} \quad (Eq. 1)$$

Where  $IPTW_T$  is the IPTW for high CRRT group patients,  $IPTW_{UN}$  is the IPTW for IHD group patients and  $\hat{e}(X)$  is the covariate balancing propensity score.

### *Stabilized inverse probability of treatment weighted*

It may happen that treated subjects have a covariate balance propensity score near 0 or that untreated subjects have a covariate balancing propensity score near 1, making the relative IPTW excessively high and unstable. Computationally, as in any weighted regression, unstabilized IPTW changes the sample size of the original sample, generating an underestimate of the variance of the estimate of the effect, producing inappropriately narrow confidence intervals and leading to the lack of control of the probability of a type I error.<sup>2</sup>

Stabilized inverse probability of treatment weight (SIPTW) can be obtained by multiplying the IPTW by the marginal probability of receiving the actual treatment

received. Moreover, it preserves the sample size of the original data, produces appropriate estimation of the variance of the main effect, and adequately controls the type I error rate. The calculation of the IPTW was done according to Eq. 2.<sup>2</sup>

$$SIPTW_T = \frac{p}{\hat{e}(X)} ; SIPTW_{UN} = \frac{1-p}{1-\hat{e}(X)} \quad (Eq.2)$$

Where  $SIPTW_T$  is the SIPTW for CRRT group patients,  $SIPTW_{UN}$  is the SIPTW for IHD group patients,  $p$  is the probability of treatment without considering covariates (defined as  $n_t / N$ ) and  $\hat{e}(X)$  is the covariate balancing propensity score.

## References

1. Xu S, Ross C, Raebel MA, Shetterly S, Blanchette C, Smith D. Use of stabilized inverse propensity score as weight to directly estimate relative risk and its confidence intervals. *Value Health*. 2010;2:273–7.
2. Kurth T, Walker AM, Glynn RJ, et al. Results of Multivariable Logistic Regression, Propensity Matching, Propensity Adjustment, and Propensity-based Weighting under Conditions of Nonuniform Effect. *Am J Epidemiol* 2006; 163:262-70.

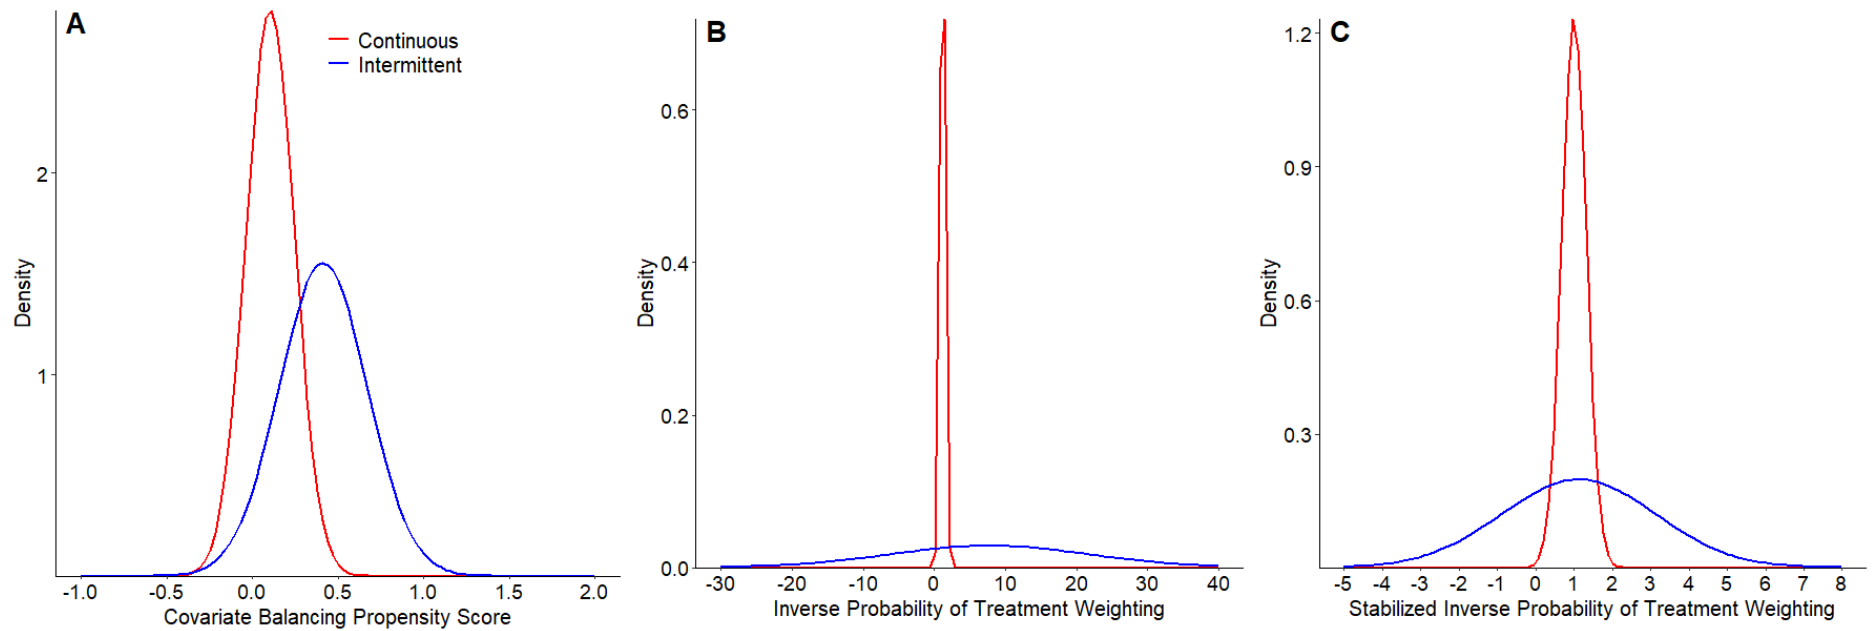

Probability density function of the: A) Covariate balancing propensity score, B) IPTW, and C) SIPTW.

**eTable 1 - Rate of Missing Data According to the Groups**

|                                                    | <b>Overall<br/>(n = 2542)</b> | <b>CRRT<br/>(n = 2175)</b> | <b>IHD<br/>(n = 367)</b> |
|----------------------------------------------------|-------------------------------|----------------------------|--------------------------|
| Age                                                | 0 (0)                         | 0 (0)                      | 0 (0)                    |
| Gender                                             | 0 (0)                         | 0 (0)                      | 0 (0)                    |
| Weight                                             | 0 (0)                         | 0 (0)                      | 0 (0)                    |
| Type of admission                                  | 0 (0)                         | 0 (0)                      | 0 (0)                    |
| APACHE III                                         | 2 (0.1)                       | 2 (0.1)                    | 0 (0)                    |
| Cardiovascular SOFA                                | 3 (0.1)                       | 3 (0.1)                    | 0 (0)                    |
| Hours between randomization and start of treatment | 0 (0)                         | 0 (0)                      | 0 (0)                    |
| Premorbid creatinine                               | 831 (32.7)                    | 747 (34.3)                 | 84 (22.9)                |
| Estimated glomerular filtration rate               | 831 (32.7)                    | 747 (34.3)                 | 84 (22.9)                |
| Diabetes                                           | 1459 (57.4)                   | 1459 (67.1)                | 0 (0)                    |
| Mechanical ventilation                             | 0 (0)                         | 0 (0)                      | 0 (0)                    |
| Sepsis                                             | 1 (0)                         | 1 (0)                      | 0 (0)                    |
| Oliguria                                           | 0 (0)                         | 0 (0)                      | 0 (0)                    |
| Hyperkalemia                                       | 2 (0.1)                       | 0 (0)                      | 2 (0.5)                  |
| Acidemia                                           | 123 (4.8)                     | 81 (3.7)                   | 42 (11.4)                |
| Urea > 25 mmol/L                                   | 2 (0.1)                       | 0 (0)                      | 2 (0.5)                  |
| Creatinine > 300 µmol/L                            | 2 (0.1)                       | 0 (0)                      | 2 (0.5)                  |
| Urea                                               | 3 (0.1)                       | 1 (0)                      | 2 (0.5)                  |
| Creatinine                                         | 6 (0.2)                       | 4 (0.2)                    | 2 (0.5)                  |
| pH                                                 | 179 (7)                       | 137 (6.3)                  | 42 (11.4)                |
| Bicarbonate                                        | 14 (0.6)                      | 12 (0.6)                   | 2 (0.5)                  |
| Renal replacement dependence at day 28             | 0 (0)                         | 0 (0)                      | 0 (0)                    |
| Renal replacement dependence at day 60             | 34 (1.3)                      | 26 (1.2)                   | 8 (2.2)                  |
| ICU length of stay                                 | 141 (5.5)                     | 129 (5.9)                  | 12 (3.3)                 |
| Hospital length of stay                            | 122 (4.8)                     | 80 (3.7)                   | 42 (11.4)                |
| ICU mortality                                      | 0 (0)                         | 0 (0)                      | 0 (0)                    |
| Hospital mortality                                 | 0 (0)                         | 0 (0)                      | 0 (0)                    |
| 28-day mortality                                   | 0 (0)                         | 0 (0)                      | 0 (0)                    |
| 60-day mortality                                   | 28 (1.1)                      | 24 (1.1)                   | 4 (1.1)                  |

**eTable 2 - Baseline Characteristics of the Patients According to Renal Replacement Therapy Dependence at Day 28 in Survivors at the Latest Follow-Up Available**

|                                                       | <b>Dependent<br/>(n = 433)</b> | <b>Independent<br/>(n = 1396)</b> | <b>p value</b> |
|-------------------------------------------------------|--------------------------------|-----------------------------------|----------------|
| Age, years                                            | 62.0 (51.0 - 73.0)             | 65.2 (54.0 - 75.0)                | 0.001          |
| Male gender - no. (%)                                 | 306 (70.7)                     | 925 (66.3)                        | 0.099          |
| Weight, kilograms                                     | 82.6 (70.5 - 94.0)             | 80.0 (70.0 - 90.7)                | 0.111          |
| Type of admission - no. (%)                           |                                |                                   | < 0.001        |
| Medical                                               | 204 (47.1)                     | 925 (66.3)                        |                |
| Surgical                                              | 199 (46.0)                     | 428 (30.7)                        |                |
| Other                                                 | 30 (6.9)                       | 43 (3.1)                          |                |
| APACHE III                                            | 85.8 (70.4 - 103.0)            | 94.0 (77.0 - 111.0)               | < 0.001        |
| Cardiovascular SOFA                                   | 3.0 (0.0 - 4.0)                | 3.0 (1.0 - 4.0)                   | < 0.001        |
| 0                                                     | 129 (29.8)                     | 291 (20.9)                        |                |
| 1                                                     | 62 (14.3)                      | 169 (12.1)                        |                |
| 2                                                     | 25 (5.8)                       | 47 (3.4)                          | < 0.001        |
| 3                                                     | 68 (15.7)                      | 259 (18.6)                        |                |
| 4                                                     | 149 (34.4)                     | 628 (45.1)                        |                |
| Hours between randomization and start of treatment    | 72.0 (24.0 - 144.0)            | 27.0 (8.0 - 72.0)                 | < 0.001        |
| Premorbid creatinine, µmol/L                          | 106.1 (79.6 - 140.0)           | 106.0 (79.6 - 138.0)              | 0.759          |
| Estimated glomerular filtration rate, mL/min          | 60.8 (44.8 - 83.2)             | 60.6 (39.9 - 82.6)                | 0.410          |
| Premorbid creatinine imputed, µmol/L*                 | 100.7 (84.3 - 123.8)           | 100.9 (84.7 - 114.9)              | 0.961          |
| Estimated glomerular filtration rate imputed, mL/min* | 49.7 (37.1 - 61.1)             | 49.0 (41.2 - 59.9)                | 0.688          |
| Diabetes - no. (%)                                    | 79 (27.7)                      | 123 (31.9)                        | 0.284          |
| At baseline - no. (%)                                 |                                |                                   |                |
| Mechanical ventilation                                | 325 (75.1)                     | 990 (70.9)                        | 0.107          |
| Sepsis                                                | 223 (51.5)                     | 734 (52.6)                        | 0.736          |
| Oliguria                                              | 307 (70.9)                     | 874 (62.6)                        | 0.002          |
| Hyperkalemia                                          | 21 (4.9)                       | 83 (5.9)                          | 0.463          |
| Acidemia                                              | 46 (11.4)                      | 379 (28.1)                        | < 0.001        |
| Urea > 25 mmol/L                                      | 171 (39.6)                     | 558 (40.0)                        | 0.922          |
| Creatinine > 300 µmol/L                               | 240 (55.6)                     | 734 (52.6)                        | 0.310          |
| High intensity group - no. (%)                        | 232 (53.6)                     | 665 (47.6)                        | 0.035          |
| Laboratory tests at baseline                          |                                |                                   |                |
| Urea, mmol/L                                          | 20.4 (13.9 - 30.2)             | 20.9 (14.1 - 30.6)                | 0.916          |
| Creatinine, µmol/L                                    | 318.2 (229.8 - 433.2)          | 309.4 (220.0 - 419.2)             | 0.133          |
| pH                                                    | 7.34 (7.28 - 7.41)             | 7.30 (7.21 - 7.37)                | < 0.001        |
| Bicarbonate, mmol/L                                   | 21.0 (17.0 - 24.0)             | 19.0 (16.0 - 23.0)                | < 0.001        |
| Process of care                                       |                                |                                   |                |
| Maximum length of follow-up                           | 27.0 (15.0 - 28.0)             | 9.0 (5.0 - 15.0)                  | < 0.001        |
| Days receiving CRRT                                   | 7.0 (3.0 - 14.0)               | 4.0 (2.0 - 6.0)                   | < 0.001        |
| Days receiving IHD                                    | 6.0 (0.0 - 13.0)               | 0.0 (0.0 - 0.0)                   | < 0.001        |
| Days until first IHD session                          | 5.0 (1.0 - 10.0)               | 4.0 (1.0 - 7.0)                   | < 0.001        |
| Modality in the first day after randomization         |                                |                                   | < 0.001        |
| CRRT                                                  | 298 (73.4)                     | 1132 (88.6)                       |                |

**eTable 2 - Baseline Characteristics of the Patients According to Renal Replacement Therapy Dependence at Day 28 in Survivors at the Latest Follow-Up Available**

|                                                | <b>Dependent<br/>(n = 433)</b> | <b>Independent<br/>(n = 1396)</b> | <b>p value</b> |
|------------------------------------------------|--------------------------------|-----------------------------------|----------------|
| IHD                                            | 108 (26.6)                     | 145 (11.4)                        |                |
| Modality in the second day after randomization |                                |                                   | < 0.001        |
| CRRT                                           | 314 (76.4)                     | 1174 (90.8)                       |                |
| IHD                                            | 97 (23.6)                      | 119 (9.2)                         |                |
| Modality in the third day after randomization  |                                |                                   | < 0.001        |
| CRRT                                           | 308 (76.8)                     | 1028 (89.8)                       |                |
| IHD                                            | 93 (23.2)                      | 117 (10.2)                        |                |
| Exclusive modality**                           |                                |                                   | < 0.001        |
| CRRT                                           | 131 (58.7)                     | 1026 (88.1)                       |                |
| IHD                                            | 92 (41.3)                      | 138 (11.9)                        |                |

Data are median (quartile 25% - quartile 75%) or No (%). Percentages may not total 100 because of rounding. Denominators are shown when the overall sample size was not available.

Abbreviations: CRRT: continuous renal replacement therapy; IHD: intermittent hemodialysis; APACHE, Acute Physiology and Chronic Health Evaluation; SOFA: Sequential Organ Failure Assessment; ICU: intensive care unit.

\* Missing values in creatinine imputed according to age and gender (Tiao JYH, *et al.* Cardiovascular Surgery 2002;10:445-51).

\*\* Defined as patients who received only one type of therapy during the available follow-up.

**eTable 3 - Process of Care According to the Groups**

|                                                | CRRT<br>(n = 2175) | IHD<br>(n = 367)  | SMD   | p value |
|------------------------------------------------|--------------------|-------------------|-------|---------|
| Process of care                                |                    |                   |       |         |
| Maximum length of detailed follow-up           | 9.0 (4.0 - 17.0)   | 12.0 (5.0 - 23.0) | 0.025 | 0.005   |
| Days receiving CRRT                            | 5.0 (3.0 - 8.0)    | 0.0 (0.0 - 0.0)   | 1.195 | < 0.001 |
| Days receiving IHD                             | 0.0 (0.0 - 0.0)    | 6.0 (2.0 - 11.5)  | 1.209 | < 0.001 |
| Days until first IHD session                   | 7.0 (5.0 - 10.0)   | 1.0 (1.0 - 1.0)   | 1.772 | < 0.001 |
| Modality in the first day after randomization  |                    |                   | 9.373 | < 0.001 |
| CRRT                                           | 1985 (98.8)        | 3 (1.0)           |       |         |
| IHD                                            | 25 (1.2)           | 310 (99.0)        |       |         |
| Modality in the second day after randomization |                    |                   | 5.326 | < 0.001 |
| CRRT                                           | 2029 (99.2)        | 16 (5.7)          |       |         |
| IHD                                            | 16 (0.8)           | 264 (94.3)        |       |         |
| Modality in the third day after randomization  |                    |                   | 4.031 | < 0.001 |
| CRRT                                           | 1769 (98.9)        | 25 (9.7)          |       |         |
| IHD                                            | 19 (1.1)           | 233 (90.3)        |       |         |
| Exclusive modality*                            |                    |                   | ---   | ---     |
| CRRT                                           | 1684 (77.4)        | ---               |       |         |
| IHD                                            | ---                | 281 (76.6)        |       |         |

Data are median (quartile 25% - quartile 75%) or No (%). Percentages may not total 100 because of rounding. Denominators are shown when the overall sample size was not available.

Abbreviations: CRRT: continuous renal replacement therapy; IHD: intermittent hemodialysis; SMD: standardized mean difference.

\* Defined as patients who received only one type of therapy during the available follow-up.



**eTable 4 - Sensitivity Analyses for the Primary Outcome**

|                                                       | <b>Effect Estimate (95% CI)</b> | <b>p value</b> |
|-------------------------------------------------------|---------------------------------|----------------|
| <b>Weighted models*</b>                               |                                 |                |
| Inverse probability of treatment weighting            | SHR, 0.96 (0.92 to 0.99)        | 0.049          |
| Stabilized inverse probability of treatment weighting | SHR, 0.96 (0.92 to 0.99)        | 0.041          |

Abbreviations: SHR: subdistribution hazard ratio; HR: hazard ratio

\* All models are cause-specific hazard models, with the dependence at day 28 as the event of interest.

**eTable 5 - Baseline Characteristics of the Patients in the Two Sensitivity Cohorts**

|                                                       | Exclusive Modality in the First Three Days <sup>a</sup> |                      |         | Exclusive Modality Over the Available Follow-up |                      |         |
|-------------------------------------------------------|---------------------------------------------------------|----------------------|---------|-------------------------------------------------|----------------------|---------|
|                                                       | CRRT<br>(n = 1617)                                      | IHD<br>(n = 203)     | p value | CRRT<br>(n = 1684)                              | IHD<br>(n = 281)     | p value |
| Age, years                                            | 64.8 (54.0 - 75.0)                                      | 61.0 (49.0 - 71.0)   | < 0.001 | 66.0 (55.0 - 75.8)                              | 62.0 (53.0 - 71.0)   | < 0.001 |
| Male gender - no. (%)                                 | 1068 (66.0)                                             | 155 (76.4)           | 0.004   | 1096 (65.1)                                     | 215 (76.5)           | < 0.001 |
| Weight, kilograms                                     | 80.0 (70.0 - 91.0)                                      | 81.1 (71.2 - 95.3)   | 0.286   | 80.0 (70.0 - 90.0)                              | 83.6 (71.0 - 97.0)   | 0.004   |
| Type of admission - no. (%)                           |                                                         |                      | 0.011   |                                                 |                      | < 0.001 |
| Medical                                               | 947 (58.6)                                              | 108 (53.2)           |         | 1094 (65.0)                                     | 152 (54.1)           |         |
| Surgical                                              | 591 (36.5)                                              | 75 (36.9)            |         | 538 (31.9)                                      | 107 (38.1)           |         |
| Other                                                 | 79 (4.9)                                                | 20 (9.9)             |         | 52 (3.1)                                        | 22 (7.8)             |         |
| APACHE III                                            | 95.1 (79.7 - 111.0)                                     | 73.5 (61.2 - 85.8)   | < 0.001 | 99.0 (83.0 - 116.0)                             | 76.6 (64.3 - 88.9)   | < 0.001 |
| Cardiovascular SOFA                                   | 4.0 (2.0 - 4.0)                                         | 0.0 (0.0 - 1.0)      | < 0.001 | 4.0 (2.0 - 4.0)                                 | 0.0 (0.0 - 1.0)      | < 0.001 |
| 0                                                     | 210 (13.0)                                              | 146 (71.9)           |         | 215 (12.8)                                      | 177 (63.0)           |         |
| 1                                                     | 171 (10.6)                                              | 37 (18.2)            |         | 175 (10.4)                                      | 46 (16.4)            |         |
| 2                                                     | 55 (3.4)                                                | 16 (7.9)             | < 0.001 | 42 (2.5)                                        | 22 (7.8)             | < 0.001 |
| 3                                                     | 331 (20.5)                                              | 3 (1.5)              |         | 315 (18.7)                                      | 13 (4.6)             |         |
| 4                                                     | 849 (52.5)                                              | 1 (0.5)              |         | 935 (55.6)                                      | 23 (8.2)             |         |
| Hours between randomization and start of treatment    | 45.0 (15.0 - 96.0)                                      | 96.0 (48.0 - 168.0)  | < 0.001 | 26.0 (8.0 - 72.0)                               | 72.0 (48.0 - 144.0)  | < 0.001 |
| Premorbid creatinine, µmol/L                          | 97.2 (79.6 - 132.6)                                     | 97.2 (79.6 - 132.6)  | 0.396   | 103.5 (79.6 - 139.8)                            | 101.7 (79.6 - 132.6) | 0.070   |
| Estimated glomerular filtration rate, mL/min          | 61.6 (43.9 - 84.4)                                      | 67.8 (51.0 - 96.0)   | 0.002   | 59.3 (39.7 - 80.3)                              | 65.3 (49.4 - 92.7)   | < 0.001 |
| Premorbid creatinine imputed, µmol/L*                 | 100.7 (84.3 - 114.9)                                    | 100.7 (81.4 - 123.8) | 0.982   | 100.9 (84.7 - 114.9)                            | 100.9 (80.7 - 123.8) | 0.585   |
| Estimated glomerular filtration rate imputed, mL/min* | 49.6 (41.8 - 60.8)                                      | 50.3 (40.1 - 64.2)   | 0.517   | 48.8 (41.7 - 59.6)                              | 49.0 (39.5 - 64.5)   | 0.225   |
| Diabetes - no. (%)                                    | 164 (26.6)                                              | 68 (33.5)            | 0.071   | 97 (27.1)                                       | 102 (36.3)           | 0.016   |
| At baseline - no. (%)                                 |                                                         |                      |         |                                                 |                      |         |
| Mechanical ventilation                                | 1298 (80.3)                                             | 107 (52.7)           | < 0.001 | 1303 (77.4)                                     | 160 (56.9)           | < 0.001 |
| Sepsis                                                | 896 (55.4)                                              | 120 (59.1)           | 0.354   | 891 (52.9)                                      | 162 (57.7)           | 0.158   |
| Oliguria                                              | 1106 (68.4)                                             | 135 (66.5)           | 0.641   | 1073 (63.7)                                     | 191 (68.0)           | 0.190   |
| Hyperkalemia                                          | 78 (4.8)                                                | 2 (1.0)              | 0.020   | 112 (6.7)                                       | 3 (1.1)              | < 0.001 |

**eTable 5 - Baseline Characteristics of the Patients in the Two Sensitivity Cohorts**

|                                | Exclusive Modality in the First Three Days <sup>a</sup> |                       |         | Exclusive Modality Over the Available Follow-up |                       |         |
|--------------------------------|---------------------------------------------------------|-----------------------|---------|-------------------------------------------------|-----------------------|---------|
|                                | CRRT<br>(n = 1617)                                      | IHD<br>(n = 203)      | p value | CRRT<br>(n = 1684)                              | IHD<br>(n = 281)      | p value |
| Acidemia                       | 357 (23.1)                                              | 9 (5.1)               | < 0.001 | 500 (30.4)                                      | 11 (4.5)              | < 0.001 |
| Urea > 25 mmol/L               | 632 (39.1)                                              | 61 (30.2)             | 0.018   | 668 (39.7)                                      | 86 (30.8)             | 0.006   |
| Creatinine > 300 µmol/L        | 823 (50.9)                                              | 110 (54.5)            | 0.379   | 822 (48.8)                                      | 159 (57.0)            | 0.014   |
| High intensity group - no. (%) | 798 (49.4)                                              | 105 (51.7)            | 0.573   | 837 (49.7)                                      | 134 (47.7)            | 0.575   |
| Laboratory tests at baseline   |                                                         |                       |         |                                                 |                       |         |
| Urea, mmol/L                   | 20.4 (13.9 - 30.6)                                      | 18.2 (12.9 - 26.7)    | 0.014   | 20.4 (13.6 - 30.7)                              | 19.6 (13.2 - 27.1)    | 0.038   |
| Creatinine, µmol/L             | 300.6 (218.0 - 412.0)                                   | 305.0 (247.5 - 397.8) | 0.371   | 291.7 (209.0 - 400.0)                           | 309.4 (247.5 - 397.8) | 0.056   |
| pH                             | 7.3 (7.2 - 7.4)                                         | 7.4 (7.3 - 7.4)       | < 0.001 | 7.3 (7.2 - 7.4)                                 | 7.4 (7.3 - 7.4)       | < 0.001 |
| Bicarbonate, mmol/L            | 20.0 (16.0 - 23.0)                                      | 22.0 (18.0 - 25.0)    | < 0.001 | 19.0 (15.0 - 22.9)                              | 22.0 (19.0 - 25.1)    | < 0.001 |

Data are median (quartile 25% - quartile 75%) or No (%). Percentages may not total 100 because of rounding. Denominators are shown when the overall sample size was not available.

Abbreviations: CRRT: continuous renal replacement therapy; IHD: intermittent hemodialysis; APACHE, Acute Physiology and Chronic Health Evaluation; SOFA: Sequential Organ Failure Assessment; ICU: intensive care unit; SMD: standardized mean difference.

<sup>a</sup> Patients who died or do not have information of modality in the first three days were excluded from this analysis.

\* Missing values in creatinine imputed according to age and gender (Tiao JYH, *et al.* Cardiovascular Surgery 2002;10:445-51).

**eTable 6 - Primary and Secondary Outcomes in the Cohort of Patients According to the Exclusive Modality Received in the First Three Days<sup>a</sup>**

|                                    | CRRT<br>(n = 1617) | IHD<br>(n = 203)   | Unadjusted Analysis         |         | Adjusted Analysis <sup>b</sup> |         |
|------------------------------------|--------------------|--------------------|-----------------------------|---------|--------------------------------|---------|
|                                    |                    |                    | Effect Estimate<br>(95% CI) | p value | Effect Estimate<br>(95% CI)    | p value |
| <b>Primary outcome</b>             |                    |                    |                             |         |                                |         |
| RRT dependence at day 28 - no. (%) | 277 (17.1)         | 82 (40.4)          |                             |         |                                |         |
| Death before the event             | 403 (24.9)         | 33 (16.3)          | SHR, 0.69 (0.62 to 0.76)    | < 0.001 | SHR, 0.92 (0.79 to 1.08)       | 0.330   |
| <b>Secondary outcomes</b>          |                    |                    |                             |         |                                |         |
| RRT dependence at day 60 - no. (%) | 128 (8.0)          | 36 (18.2)          |                             |         |                                |         |
| Death before the event             | 452 (28.4)         | 46 (23.2)          | SHR, 0.69 (0.57 to 0.83)    | < 0.001 | SHR, 0.92 (0.72 to 1.18)       | 0.510   |
| RRT-free days at day 28            | 0.0 (0.0 - 21.0)   | 0.0 (0.0 - 17.0)   |                             |         |                                |         |
| Mean ± SD                          | 9.1 ± 10.6         | 7.0 ± 9.6          | COR, 1.44 (1.09 to 1.91)    | 0.011   | COR, 1.66 (1.17 to 2.36)       | 0.004   |
| ICU length of stay, days           | 11.0 (6.0 - 22.0)  | 14.0 (7.0 - 25.0)  |                             |         |                                |         |
| In survivors                       | 12.0 (7.0 - 22.0)  | 13.0 (6.0 - 24.0)  | SHR, 0.66 (0.56 to 0.78)*   | < 0.001 | SHR, 0.78 (0.62 to 0.98)*      | 0.032   |
| Hospital length of stay, days      | 22.0 (11.0 - 39.0) | 27.5 (17.0 - 42.2) |                             |         |                                |         |
| In survivors                       | 30.0 (18.0 - 48.5) | 30.0 (18.0 - 43.0) | SHR, 0.56 (0.47 to 0.68)*   | < 0.001 | SHR, 0.72 (0.57 to 0.91)*      | 0.007   |
| ICU mortality - no. (%)            | 576 (35.6)         | 37 (18.2)          | OR, 2.48 (1.73 to 3.64)     | < 0.001 | OR, 1.55 (0.98 to 2.49)        | 0.066   |
| Hospital mortality - no. (%)       | 700 (43.3)         | 45 (22.2)          | OR, 2.68 (1.91 to 3.82)     | < 0.001 | OR, 1.65 (1.08 to 2.55)        | 0.021   |
| 28-day mortality - no. (%)         | 589 (36.4)         | 40 (19.7)          | HR, 2.04 (1.48 to 2.81)**   | < 0.001 | HR, 1.25 (0.86 to 1.82)        | 0.245   |
| 60-day mortality - no. (%)         | 695 (43.5)         | 59 (29.5)          | HR, 1.66 (1.27 to 2.16)**   | < 0.001 | HR, 1.14 (0.83 to 1.57)        | 0.418   |
| <b>Sensitivity analysis</b>        |                    |                    |                             |         |                                |         |
| Among survivors- no. (%)           |                    |                    |                             |         |                                |         |
| RRT dependence at day 28           | 201 (23.0)         | 66 (46.8)          | OR, 0.33 (0.23 to 0.49)     | < 0.001 | OR, 0.42 (0.26 to 0.70)        | < 0.001 |
| RRT dependence at day 60           | 121 (13.9)         | 36 (25.9)          | OR, 0.46 (0.30 to 0.71)     | < 0.001 | OR, 0.66 (0.37 to 1.18)        | 0.162   |

Data are median (quartile 25% - quartile 75%) or No (%). Percentages may not total 100 because of rounding. Denominators are shown when the overall sample size was not available.

Abbreviations: CRRT: continuous renal replacement therapy; IHD: intermittent hemodialysis; ICU: intensive care unit; RRT: renal replacement therapy; SHR: subdistribution hazard ratio; MD: mean difference; RRT: renal replacement therapy; HR: hazard ratio; OR: odds ratio; COR: common odds ratio.

<sup>a</sup> Patients who died or do not have information of modality in the first three days were excluded from this analysis.

<sup>b</sup> All models adjusted for age, gender, weight, type of admission (medical, surgical or other), APACHE III, cardiovascular SOFA, hours between randomization and therapy, use of mechanical ventilation, presence of oliguria, presence of hyperkalemia, presence of sepsis, last bicarbonate, urea and creatinine before randomization, premorbid estimated glomerular filtration rate and intensity of treatment (as allocated in the original trials).

\* ICU and hospital length of stay censored at day 60.

\*\* p value for Schoenfeld residual is 0.360 for 28-day mortality and 0.330 for 60-day mortality.

**eTable 7 - Primary and Secondary Outcomes in the Cohort of Patients According to the Exclusive Modality Received in the Available Follow-up**

|                                    | CRRT<br>(n = 1684) | IHD<br>(n = 281)   | Unadjusted Analysis         |         | Adjusted Analysis <sup>a</sup> |         |
|------------------------------------|--------------------|--------------------|-----------------------------|---------|--------------------------------|---------|
|                                    |                    |                    | Effect Estimate<br>(95% CI) | p value | Effect Estimate<br>(95% CI)    | p value |
| <b>Primary outcome</b>             |                    |                    |                             |         |                                |         |
| RRT dependence at day 28 - no. (%) | 131 (7.8)          | 92 (32.7)          |                             |         |                                |         |
| Death before the event             | 527 (31.3)         | 51 (18.1)          | SHR, 0.49 (0.43 to 0.56)    | < 0.001 | SHR, 0.57 (0.47 to 0.71)       | < 0.001 |
| <b>Secondary outcomes</b>          |                    |                    |                             |         |                                |         |
| RRT dependence at day 60 - no. (%) | 54 (3.2)           | 42 (15.3)          |                             |         |                                |         |
| Death before the event             | 551 (33.1)         | 63 (23.0)          | SHR, 0.44 (0.35 to 0.56)    | < 0.001 | SHR, 0.61 (0.43 to 0.86)       | 0.005   |
| RRT-free days at day 28            | 0.0 (0.0 - 23.0)   | 0.0 (0.0 - 19.0)   |                             |         |                                |         |
| Mean ± SD                          | 10.2 ± 11.3        | 8.3 ± 10.6         | COR, 1.32 (1.04 to 1.68)    | 0.024   | COR, 1.54 (1.14 to 2.10)       | 0.005   |
| ICU length of stay, days           | 8.0 (4.0 - 15.0)   | 13.0 (7.0 - 23.0)  |                             |         |                                |         |
| In survivors                       | 8.0 (5.0 - 16.0)   | 13.0 (7.0 - 23.0)  | SHR, 0.65 (0.57 to 0.74)*   | < 0.001 | SHR, 0.74 (0.62 to 0.90)*      | 0.002   |
| Hospital length of stay, days      | 16.0 (7.0 - 33.0)  | 24.0 (16.0 - 41.0) |                             |         |                                |         |
| In survivors                       | 25.0 (15.0 - 45.0) | 27.0 (17.0 - 42.0) | SHR, 0.53 (0.45 to 0.62)*   | < 0.001 | SHR, 0.56 (0.45 to 0.69)*      | < 0.001 |
| ICU mortality - no. (%)            | 720 (42.8)         | 58 (20.6)          | OR, 2.87 (2.13 to 3.92)     | < 0.001 | OR, 2.21 (1.50 to 3.27)        | < 0.001 |
| Hospital mortality - no. (%)       | 859 (51.0)         | 69 (24.6)          | OR, 3.20 (2.41 to 4.29)     | < 0.001 | OR, 2.44 (1.71 to 3.54)        | < 0.001 |
| 28-day mortality - no. (%)         | 746 (44.3)         | 67 (23.8)          | HR, 2.15 (1.67 to 2.76)**   | < 0.001 | HR, 1.46 (1.09 to 1.94)        | 0.010   |
| 60-day mortality - no. (%)         | 826 (49.6)         | 87 (31.4)          | HR, 1.86 (1.49 to 2.31)**   | < 0.001 | HR, 1.39 (1.07 to 1.81)        | 0.012   |
| <b>Sensitivity analysis</b>        |                    |                    |                             |         |                                |         |
| Among survivors - no. (%)          |                    |                    |                             |         |                                |         |
| RRT dependence at day 28           | 82 (10.2)          | 76 (40.0)          | OR, 0.17 (0.12 to 0.25)     | < 0.001 | OR, 0.19 (0.11 to 0.33)        | < 0.001 |
| RRT dependence at day 60           | 47 (5.8)           | 42 (22.5)          | OR, 0.21 (0.14 to 0.34)     | < 0.001 | OR, 0.34 (0.18 to 0.66)        | 0.001   |

Data are median (quartile 25% - quartile 75%) or No (%). Percentages may not total 100 because of rounding. Denominators are shown when the overall sample size was not available.

Abbreviations: CRRT: continuous renal replacement therapy; IHD: intermittent hemodialysis; ICU: intensive care unit; RRT: renal replacement therapy; SHR: subdistribution hazard ratio; MD: mean difference; RRT: renal replacement therapy; HR: hazard ratio; OR: odds ratio; COR: common odds ratio.

<sup>a</sup> All models adjusted for age, gender, weight, type of admission (medical, surgical or other), APACHE III, cardiovascular SOFA, hours between randomization and therapy, use of mechanical ventilation, presence of oliguria, presence of hyperkalemia, presence of sepsis, last bicarbonate, urea and creatinine before randomization, premorbid estimated glomerular filtration rate and intensity of treatment (as allocated in the original trials).

\* ICU and hospital length of stay censored at day 60.

\*\* p value for Schoenfeld residual is 0.850 for 28-day mortality and 0.110 for 60-day mortality.

**eTable 8 - Baseline Characteristics According to Modality of Dialysis in Patients Surviving Until the Latest Follow-Up**

|                                                       | CRRT<br>(n = 1110)    | IHD<br>(n = 220)      | p value |
|-------------------------------------------------------|-----------------------|-----------------------|---------|
| Age, years                                            | 63.8 (50.9 - 73.6)    | 60.0 (48.0 - 69.0)    | 0.002   |
| Male gender - no. (%)                                 | 721 (65.0)            | 163 (74.1)            | 0.011   |
| Weight, kilograms                                     | 80.8 (70.0 - 91.3)    | 84.3 (71.2 - 97.5)    | 0.076   |
| Type of admission - no. (%)                           |                       |                       | < 0.001 |
| Medical                                               | 691 (62.3)            | 108 (49.1)            |         |
| Surgical                                              | 376 (33.9)            | 94 (42.7)             |         |
| Other                                                 | 43 (3.9)              | 18 (8.2)              |         |
| APACHE III                                            | 93.0 (77.0 - 109.0)   | 73.5 (63.5 - 85.8)    | < 0.001 |
| Cardiovascular SOFA                                   | 3.0 (1.0 - 4.0)       | 0.0 (0.0 - 1.0)       | < 0.001 |
| 0                                                     | 188 (16.9)            | 140 (63.6)            |         |
| 1                                                     | 130 (11.7)            | 34 (15.5)             |         |
| 2                                                     | 41 (3.7)              | 16 (7.3)              | < 0.001 |
| 3                                                     | 233 (21.0)            | 7 (3.2)               |         |
| 4                                                     | 518 (46.7)            | 23 (10.5)             |         |
| Hours between randomization and start of treatment    | 25.0 (7.2 - 70.8)     | 72.0 (24.0 - 168.0)   | < 0.001 |
| Premorbid creatinine, µmol/L                          | 100.0 (79.6 - 138.0)  | 106.1 (70.7 - 132.6)  | 0.153   |
| Estimated glomerular filtration rate, mL/min          | 61.6 (41.9 - 84.9)    | 68.6 (50.9 - 95.5)    | < 0.001 |
| Premorbid creatinine imputed, µmol/L*                 | 100.7 (84.7 - 110.0)  | 100.7 (79.6 - 123.8)  | 0.699   |
| Estimated glomerular filtration rate imputed, mL/min* | 50.3 (42.0 - 60.1)    | 50.7 (40.1 - 65.5)    | 0.333   |
| Diabetes - no. (%)                                    | 78 (25.8)             | 80 (36.4)             | 0.013   |
| At baseline - no. (%)                                 |                       |                       |         |
| Mechanical ventilation                                | 802 (72.3)            | 118 (53.6)            | < 0.001 |
| Sepsis                                                | 549 (49.5)            | 132 (60.0)            | 0.005   |
| Oliguria                                              | 718 (64.7)            | 140 (63.6)            | 0.826   |
| Hyperkalemia                                          | 76 (6.8)              | 3 (1.4)               | 0.003   |
| Acidemia                                              | 287 (26.7)            | 10 (5.2)              | < 0.001 |
| Urea > 25 mmol/L                                      | 433 (39.0)            | 64 (29.4)             | 0.009   |
| Creatinine > 300 µmol/L                               | 611 (55.0)            | 114 (52.3)            | 0.502   |
| High intensity group - no. (%)                        | 553 (49.8)            | 102 (46.4)            | 0.388   |
| Laboratory tests at baseline                          |                       |                       |         |
| Urea, mmol/L                                          | 20.4 (14.0 - 30.2)    | 18.7 (12.6 - 26.4)    | 0.005   |
| Creatinine, µmol/L                                    | 320.0 (226.0 - 443.5) | 300.6 (229.8 - 397.8) | 0.125   |
| pH                                                    | 7.30 (7.21 - 7.37)    | 7.36 (7.29 - 7.42)    | < 0.001 |
| Bicarbonate, mmol/L                                   | 19.0 (15.0 - 23.0)    | 22.0 (18.5 - 26.0)    | < 0.001 |

Data are median (quartile 25% - quartile 75%) or No (%). Percentages may not total 100 because of rounding. Denominators are shown when the overall sample size was not available.

Abbreviations: CRRT: continuous renal replacement therapy; IHD: intermittent hemodialysis; APACHE, Acute Physiology and Chronic Health Evaluation; SOFA: Sequential Organ Failure Assessment; ICU: intensive care unit.

\* Missing values in creatinine imputed according to age and gender (Tiao JYH, *et al.* Cardiovascular Surgery 2002;10:445-51).

**eTable 9 - Baseline Characteristics According to Modality of Dialysis in Patients with Cardiovascular SOFA  $\leq$  2 at Baseline**

|                                                       | CRRT<br>(n = 599)     | IHD<br>(n = 301)      | p value |
|-------------------------------------------------------|-----------------------|-----------------------|---------|
| Age, years                                            | 63.4 (52.0 - 74.0)    | 62.0 (51.0 - 71.0)    | 0.077   |
| Male gender - no. (%)                                 | 393 (65.6)            | 230 (76.4)            | 0.001   |
| Weight, kilograms                                     | 80.0 (70.0 - 90.9)    | 82.6 (71.3 - 95.7)    | 0.054   |
| Type of admission - no. (%)                           |                       |                       | < 0.001 |
| Medical                                               | 403 (67.3)            | 159 (52.8)            |         |
| Surgical                                              | 158 (26.4)            | 112 (37.2)            |         |
| Other                                                 | 38 (6.3)              | 30 (10.0)             |         |
| APACHE III                                            | 90.0 (74.0 - 104.2)   | 73.5 (64.3 - 88.9)    | < 0.001 |
| Cardiovascular SOFA                                   | 1.0 (0.0 - 1.0)       | 0.0 (0.0 - 1.0)       | < 0.001 |
| 0                                                     | 298 (49.7)            | 212 (70.4)            |         |
| 1                                                     | 234 (39.1)            | 61 (20.3)             | < 0.001 |
| 2                                                     | 67 (11.2)             | 28 (9.3)              |         |
| Hours between randomization and start of treatment    | 33.0 (5.0 - 96.0)     | 96.0 (48.0 - 168.0)   | < 0.001 |
| Premorbid creatinine, $\mu\text{mol/L}$               | 106.1 (79.6 - 151.0)  | 97.2 (70.7 - 132.6)   | 0.005   |
| Estimated glomerular filtration rate, mL/min          | 58.0 (36.8 - 82.3)    | 65.8 (49.7 - 93.8)    | < 0.001 |
| Premorbid creatinine imputed, $\mu\text{mol/L}^*$     | 100.9 (84.3 - 123.8)  | 100.7 (79.6 - 123.8)  | 0.114   |
| Estimated glomerular filtration rate imputed, mL/min* | 48.8 (37.1 - 60.4)    | 49.0 (40.1 - 64.3)    | 0.086   |
| Diabetes - no. (%)                                    | 49 (25.1)             | 107 (35.5)            | 0.019   |
| At baseline - no. (%)                                 |                       |                       |         |
| Mechanical ventilation                                | 353 (58.9)            | 171 (56.8)            | 0.591   |
| Sepsis                                                | 260 (43.4)            | 171 (56.8)            | < 0.001 |
| Oliguria                                              | 361 (60.3)            | 202 (67.1)            | 0.054   |
| Hyperkalemia                                          | 53 (8.8)              | 3 (1.0)               | < 0.001 |
| Acidemia                                              | 107 (18.6)            | 11 (4.2)              | < 0.001 |
| Urea > 25 mmol/L                                      | 321 (53.6)            | 96 (32.0)             | < 0.001 |
| Creatinine > 300 $\mu\text{mol/L}$                    | 374 (62.4)            | 168 (56.0)            | 0.074   |
| High intensity group - no. (%)                        | 312 (52.1)            | 145 (48.2)            | 0.300   |
| Laboratory tests at baseline                          |                       |                       |         |
| Urea, mmol/L                                          | 26.4 (16.6 - 35.2)    | 19.3 (13.5 - 27.5)    | < 0.001 |
| Creatinine, $\mu\text{mol/L}$                         | 360.0 (247.0 - 495.0) | 309.4 (238.7 - 415.5) | < 0.001 |
| pH                                                    | 7.32 (7.25 - 7.39)    | 7.36 (7.29 - 7.41)    | < 0.001 |
| Bicarbonate, mmol/L                                   | 19.0 (15.2 - 23.0)    | 22.0 (18.0 - 25.1)    | < 0.001 |

Data are median (quartile 25% - quartile 75%) or No (%). Percentages may not total 100 because of rounding. Denominators are shown when the overall sample size was not available.

Abbreviations: CRRT: continuous renal replacement therapy; IHD: intermittent hemodialysis; APACHE, Acute Physiology and Chronic Health Evaluation; SOFA: Sequential Organ Failure Assessment; ICU: intensive care unit.

\* Missing values in creatinine imputed according to age and gender (Tiao JYH, *et al.* Cardiovascular Surgery 2002;10:445-51).

**eTable 10 - Primary and Secondary Outcomes in the Cohort of Patients with Cardiovascular SOFA ≤ 2 at Baseline**

|                                    | CRRT<br>(n = 599)  | IHD<br>(n = 301)   | Unadjusted Analysis         |         | Adjusted Analysis <sup>a</sup> |         |
|------------------------------------|--------------------|--------------------|-----------------------------|---------|--------------------------------|---------|
|                                    |                    |                    | Effect Estimate<br>(95% CI) | p value | Effect Estimate<br>(95% CI)    | p value |
| <b>Primary outcome</b>             |                    |                    |                             |         |                                |         |
| RRT dependence at day 28 - no. (%) | 116 (19.4)         | 100 (33.2)         |                             |         |                                |         |
| Death before the event             | 107 (17.9)         | 70 (23.3)          | SHR, 0.93 (0.82 to 1.06)    | 0.300   | SHR, 0.99 (0.86 to 1.16)       | 0.990   |
| <b>Secondary outcomes</b>          |                    |                    |                             |         |                                |         |
| RRT dependence at day 60 - no. (%) | 60 (10.2)          | 46 (15.7)          |                             |         |                                |         |
| Death before the event             | 122 (20.7)         | 84 (28.7)          | SHR, 0.99 (0.80 to 1.23)    | 0.930   | SHR, 1.07 (0.85 to 1.34)       | 0.560   |
| ICU length of stay, days           | 8.0 (4.0 - 17.0)   | 13.0 (7.0 - 25.0)  |                             |         |                                |         |
| In survivors                       | 8.0 (4.0 - 16.0)   | 13.0 (7.0 - 25.0)  | SHR, 1.12 (0.96 to 1.31)*   | 0.160   | SHR, 1.01 (0.84 to 1.23)*      | 0.890   |
| RRT-free days at day 28            | 4.0 (0.0 - 22.0)   | 0.0 (0.0 - 17.0)   |                             |         |                                |         |
| Mean ± SD                          | 10.6 ± 11.3        | 7.4 ± 10.2         | COR, 1.72 (1.32 to 2.25)    | < 0.001 | COR, 1.55 (1.14 to 2.13)       | 0.005   |
| Hospital length of stay, days      | 21.0 (11.0 - 38.0) | 26.0 (16.0 - 41.0) |                             |         |                                |         |
| In survivors                       | 25.0 (15.0 - 42.0) | 28.5 (17.2 - 43.8) | SHR, 0.87 (0.72 to 1.04)*   | 0.130   | SHR, 0.82 (0.66 to 1.01)*      | 0.670   |
| ICU mortality - no. (%)            | 157 (26.2)         | 77 (25.6)          | OR, 1.03 (0.75 to 1.42)     | 0.839   | OR, 0.96 (0.66 to 1.41)        | 0.855   |
| Hospital mortality - no. (%)       | 221 (36.9)         | 87 (28.9)          | OR, 1.43 (1.07 to 1.94)     | 0.017   | OR, 1.13 (0.79 to 1.62)        | 0.487   |
| 28-day mortality - no. (%)         | 173 (28.9)         | 83 (27.6)          | HR, 1.05 (0.81 to 1.37)**   | 0.703   | HR, 0.84 (0.63 to 1.13)**      | 0.245   |
| 60-day mortality - no. (%)         | 216 (36.5)         | 107 (36.0)         | HR, 1.02 (0.81 to 1.28)**   | 0.892   | HR, 0.85 (0.65 to 1.10)**      | 0.221   |
| <b>Sensitivity analysis</b>        |                    |                    |                             |         |                                |         |
| Among survivors - no. (%)          |                    |                    |                             |         |                                |         |
| RRT dependence at day 28           | 86 (24.0)          | 81 (42.6)          | OR, 0.42 (0.29 to 0.62)     | < 0.001 | OR, 0.53 (0.33 to 0.50)        | 0.008   |
| RRT dependence at day 60           | 54 (15.1)          | 46 (24.6)          | OR, 0.54 (0.35 to 0.85)     | 0.007   | OR, 0.61 (0.35 to 1.07)        | 0.082   |

Data are median (quartile 25% - quartile 75%) or No (%). Percentages may not total 100 because of rounding. Denominators are shown when the overall sample size was not available.

Abbreviations: CRRT: continuous renal replacement therapy; IHD: intermittent hemodialysis; ICU: intensive care unit; RRT: renal replacement therapy; SHR: subdistribution hazard ratio; MD: mean difference; RRT: renal replacement therapy; HR: hazard ratio; OR: odds ratio.; COR: common odds ratio.

<sup>a</sup> All models adjusted for age, gender, weight, type of admission (medical, surgical or other), APACHE III, cardiovascular SOFA, hours between randomization and therapy, use of mechanical ventilation, presence of oliguria, presence of hyperkalemia, presence of sepsis, last bicarbonate, urea and creatinine before randomization, premorbid estimated glomerular filtration rate and intensity of treatment (as allocated in the original trials).

\* ICU and hospital length of stay censored at day 60.

\*\* p value for Schoenfeld residual is 0.670 for 28-day mortality and 0.840 for 60-day mortality.



**eTable 11 - Baseline Characteristics of Patients Receiving CRRT and with Cardiovascular SOFA  $\geq$  3 at Baseline**

|                                                       | ATN<br>(n = 521)      | RENAL<br>(n = 1052)   | p value |
|-------------------------------------------------------|-----------------------|-----------------------|---------|
| Age, years                                            | 61.0 (51.0 - 72.0)    | 67.6 (57.7 - 76.3)    | < 0.001 |
| Male gender - no. (%)                                 | 357 (68.5)            | 678 (64.4)            | 0.122   |
| Weight, kilograms                                     | 82.0 (70.0 - 95.5)    | 80.0 (70.0 - 90.0)    | 0.004   |
| Type of admission - no. (%)                           |                       |                       | < 0.001 |
| Medical                                               | 224 (43.0)            | 722 (68.6)            |         |
| Surgical                                              | 240 (46.1)            | 330 (31.4)            |         |
| Other                                                 | 57 (10.9)             | 0 (0.0)               |         |
| APACHE III                                            | 92.0 (76.6 - 107.4)   | 105.0 (88.0 - 122.0)  | < 0.001 |
| Cardiovascular SOFA                                   |                       |                       |         |
| 3                                                     | 159 (30.5)            | 266 (25.3)            | 0.032   |
| 4                                                     | 362 (69.5)            | 786 (74.7)            |         |
| Hours between randomization and start of treatment    | 72.0 (48.0 - 144.0)   | 21.0 (8.0 - 48.0)     | < 0.001 |
| Premorbid creatinine, $\mu$ mol/L                     | 88.4 (70.7 - 114.9)   | 106.0 (80.0 - 150.0)  | < 0.001 |
| Estimated glomerular filtration rate, mL/min          | 70.2 (53.1 - 96.9)    | 56.4 (36.1 - 75.7)    | < 0.001 |
| Premorbid creatinine imputed, $\mu$ mol/L*            | 91.5 (79.6 - 106.1)   | 101.0 (86.1 - 110.2)  | < 0.001 |
| Estimated glomerular filtration rate imputed, mL/min* | 54.1 (43.8 - 68.0)    | 48.2 (41.8 - 58.6)    | < 0.001 |
| Diabetes - no. (%)                                    | 137 (26.3)            | N/A                   | ---     |
| At baseline - no. (%)                                 |                       |                       |         |
| Mechanical ventilation                                | 480 (92.1)            | 878 (83.5)            | < 0.001 |
| Sepsis                                                | 347 (66.6)            | 564 (53.6)            | < 0.001 |
| Oliguria                                              | 436 (83.7)            | 660 (62.7)            | < 0.001 |
| Hyperkalemia                                          | 7 (1.3)               | 63 (6.0)              | < 0.001 |
| Acidemia                                              | 32 (6.9)              | 431 (41.0)            | < 0.001 |
| Urea > 25 mmol/L                                      | 167 (32.1)            | 353 (33.6)            | 0.590   |
| Creatinine > 300 $\mu$ mol/L                          | 294 (56.4)            | 417 (39.6)            | < 0.001 |
| High intensity group - no. (%)                        | 262 (50.3)            | 509 (48.4)            | 0.511   |
| Laboratory tests at baseline                          |                       |                       |         |
| Urea, mmol/L                                          | 19.3 (13.6 - 27.5)    | 18.4 (12.7 - 28.1)    | 0.268   |
| Creatinine, $\mu$ mol/L                               | 318.2 (238.7 - 424.3) | 261.0 (192.0 - 357.0) | < 0.001 |
| pH                                                    | 7.35 (7.28 - 7.41)    | 7.26 (7.16 - 7.34)    | < 0.001 |
| Bicarbonate, mmol/L                                   | 21.0 (18.0 - 24.0)    | 18.0 (14.7 - 22.0)    | < 0.001 |

Data are median (quartile 25% - quartile 75%) or No (%). Percentages may not total 100 because of rounding. Denominators are shown when the overall sample size was not available.

Abbreviations: CRRT: continuous renal replacement therapy; IHD: intermittent hemodialysis; APACHE, Acute Physiology and Chronic Health Evaluation; SOFA: Sequential Organ Failure Assessment; ICU: intensive care unit.

\* Missing values in creatinine imputed according to age and gender (Tiao JYH, *et al.* Cardiovascular Surgery 2002;10:445-51).

**eTable 12 - Process of Care According to the Groups**

|                                             | <b>ATN<br/>(n = 521)</b> | <b>RENAL<br/>(n = 1052)</b> | <b>SMD</b> | <b>p value</b> |
|---------------------------------------------|--------------------------|-----------------------------|------------|----------------|
| Process of care                             |                          |                             |            |                |
| Maximum length of follow-up                 | 9.0 (4.0 - 20.0)         | 9.0 (5.0 - 16.0)            | 0.136      | 0.072          |
| Days receiving CRRT                         | 7.0 (4.0 - 12.0)         | 4.0 (3.0 - 7.0)             | 0.498      | < 0.001        |
| Use of IHD overall                          | 234 (44.9)               | 69 (6.6)                    | 0.976      | < 0.001        |
| Days on IHD among those who received it     | 5.0 (2.0 - 9.0)          | 2.0 (1.0 - 4.0)             | 0.764      | < 0.001        |
| Use of IHD in survivors                     | 142 / 198 (72.2)         | 47 / 553 (8.5)              | 1.708      | < 0.001        |
| Days on IHD in survivors overall            | 4.0 (0.0 - 8.0)          | 0.0 (0.0 - 0.0)             | 1.279      | < 0.001        |
| Days on IHD among survivors who received it | 7.0 (3.0 - 10.0)         | 2.0 (1.0 - 4.5)             | 1.009      | < 0.001        |

Data are median (quartile 25% - quartile 75%) or No (%). Percentages may not total 100 because of rounding. Denominators are shown when the overall sample size was not available.

Abbreviations: CRRT: continuous renal replacement therapy; IHD: intermittent hemodialysis; SMD: standardized mean difference.

\* Defined as patients who received only one type of therapy during the available follow-up.

**eTable 13 - Primary and Secondary Outcomes in the Cohort of Patients Receiving CRRT and with Cardiovascular SOFA  $\geq$  3 at Baseline**

|                                    | ATN<br>(n = 521)   | RENAL<br>(n = 1052) | Unadjusted Analysis         |         | Adjusted Analysis <sup>a</sup> |         |
|------------------------------------|--------------------|---------------------|-----------------------------|---------|--------------------------------|---------|
|                                    |                    |                     | Effect Estimate<br>(95% CI) | p value | Effect Estimate<br>(95% CI)    | p value |
| <b>Primary outcome</b>             |                    |                     |                             |         |                                |         |
| RRT dependence at day 28 - no. (%) | 114 (21.9)         | 90 (8.6)            |                             |         |                                |         |
| Death before the event             | 259 (49.7)         | 251 (23.9)          | SHR, 1.04 (0.88 to 1.24)    | 0.620   | SHR, 0.95 (0.76 to 1.18)       | 0.640   |
| <b>Secondary outcomes</b>          |                    |                     |                             |         |                                |         |
| RRT dependence at day 60 - no. (%) | 55 (10.6)          | 30 (2.9)            |                             |         |                                |         |
| Death before the event             | 291 (56.3)         | 259 (25.0)          | SHR, 1.21 (0.88 to 1.66)    | 0.230   | SHR, 1.12 (0.73 to 1.72)       | 0.600   |
| ICU length of stay, days           | 15.0 (8.0 - 28.0)  | 8.0 (3.2 - 14.0)    |                             |         |                                |         |
| In survivors                       | 22.0 (12.8 - 33.0) | 9.0 (6.0 - 17.0)    | SHR, 0.59 (0.51 to 0.68)*   | < 0.001 | SHR, 0.54 (0.44 to 0.65)       | < 0.001 |
| RRT-free days at day 28            | 0.0 (0.0 - 0.0)    | 5.5 (0.0 - 23.0)    |                             |         |                                |         |
| Mean $\pm$ SD                      | 4.3 $\pm$ 8.3      | 10.7 $\pm$ 11.1     | COR, 0.29 (0.23 to 0.36)    | < 0.001 | COR, 0.22 (0.16 to 0.29)       | < 0.001 |
| Hospital length of stay, days      | 22.0 (11.0 - 37.0) | 17.0 (6.0 - 36.0)   |                             |         |                                |         |
| In survivors                       | 35.0 (22.0 - 49.0) | 29.0 (16.0 - 52.0)  | SHR, 0.72 (0.61 to 0.86)*   | < 0.001 | SHR, 0.72 (0.58 to 0.90)       | 0.004   |
| ICU mortality - no. (%)            | 280 (53.7)         | 408 (38.8)          | OR, 1.83 (1.48 to 2.27)     | < 0.001 | OR, 2.68 (2.02 to 3.59)        | < 0.001 |
| Hospital mortality - no. (%)       | 293 (56.2)         | 499 (47.4)          | OR, 1.42 (1.15 to 1.76)     | 0.001   | OR, 2.10 (1.58 to 2.80)        | < 0.001 |
| 28-day mortality - no. (%)         | 280 (53.7)         | 420 (39.9)          | HR, 1.51 (1.30 to 1.76)**   | < 0.001 | HR, 2.18 (1.80 to 2.64)        | < 0.001 |
| 60-day mortality - no. (%)         | 322 (61.9)         | 465 (44.8)          | HR, 1.59 (1.38 to 1.84)**   | < 0.001 | HR, 2.16 (1.81 to 2.59)        | < 0.001 |
| <b>Sensitivity analysis</b>        |                    |                     |                             |         |                                |         |
| Among survivors - no. (%)          |                    |                     |                             |         |                                |         |
| RRT dependence at day 28           | 83 (41.9)          | 63 (11.4)           | OR, 5.61 (3.83 to 8.28)     | < 0.001 | OR, 6.87 (4.18 to 11.43)       | < 0.001 |
| RRT dependence at day 60           | 55 (28.2)          | 27 (4.9)            | OR, 7.65 (4.70 to 12.74)    | < 0.001 | OR, 9.13 (4.91 to 17.50)       | < 0.001 |

Data are median (quartile 25% - quartile 75%) or No (%). Percentages may not total 100 because of rounding. Denominators are shown when the overall sample size was not available.

Abbreviations: CRRT: continuous renal replacement therapy; IHD: intermittent hemodialysis; ICU: intensive care unit; RRT: renal replacement therapy; SHR: subdistribution hazard ratio; MD: mean difference; RRT: renal replacement therapy; HR: hazard ratio; OR: odds ratio.; COR: common odds ratio.

<sup>a</sup> All models adjusted for age, gender, weight, type of admission (medical, surgical or other), APACHE III, cardiovascular SOFA, hours between randomization and therapy, use of mechanical ventilation, presence of oliguria, presence of hyperkalemia, presence of sepsis, last bicarbonate, urea and creatinine before randomization, premorbid estimated glomerular filtration rate and intensity of treatment (as allocated in the original trials).

\* ICU and hospital length of stay censored at day 60. \*\* p value for Schoenfeld residual is 0.840 for 28-day mortality and 0.370 for 60-day mortality.

**eFigure 1 - Flowchart of the Included Patients**

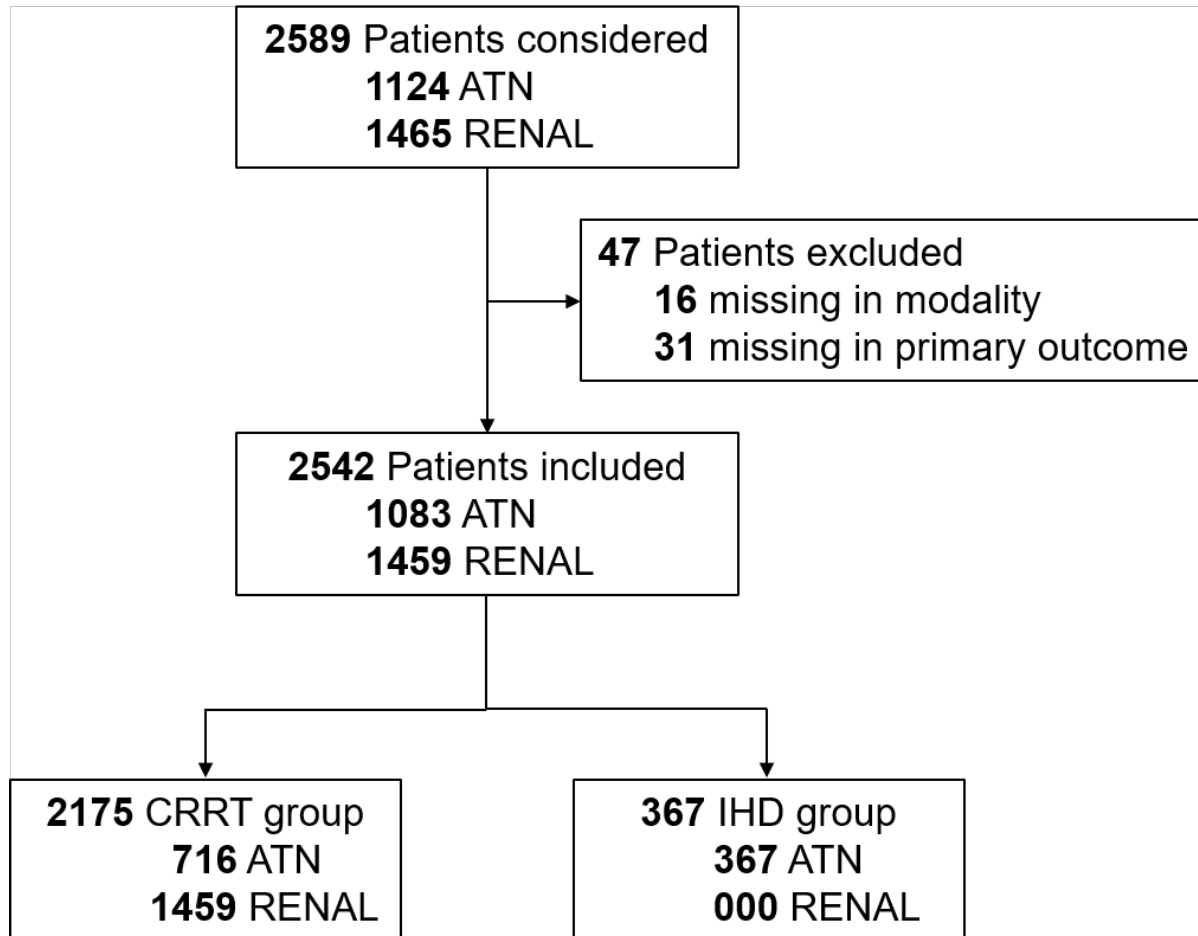

CRRT denotes continuous renal replacement therapy and IHD intermittent hemodialysis.

**eFigure 2 - Percentage of Patients Receiving Continuous Renal Replacement Therapy Over the First 28 Days**

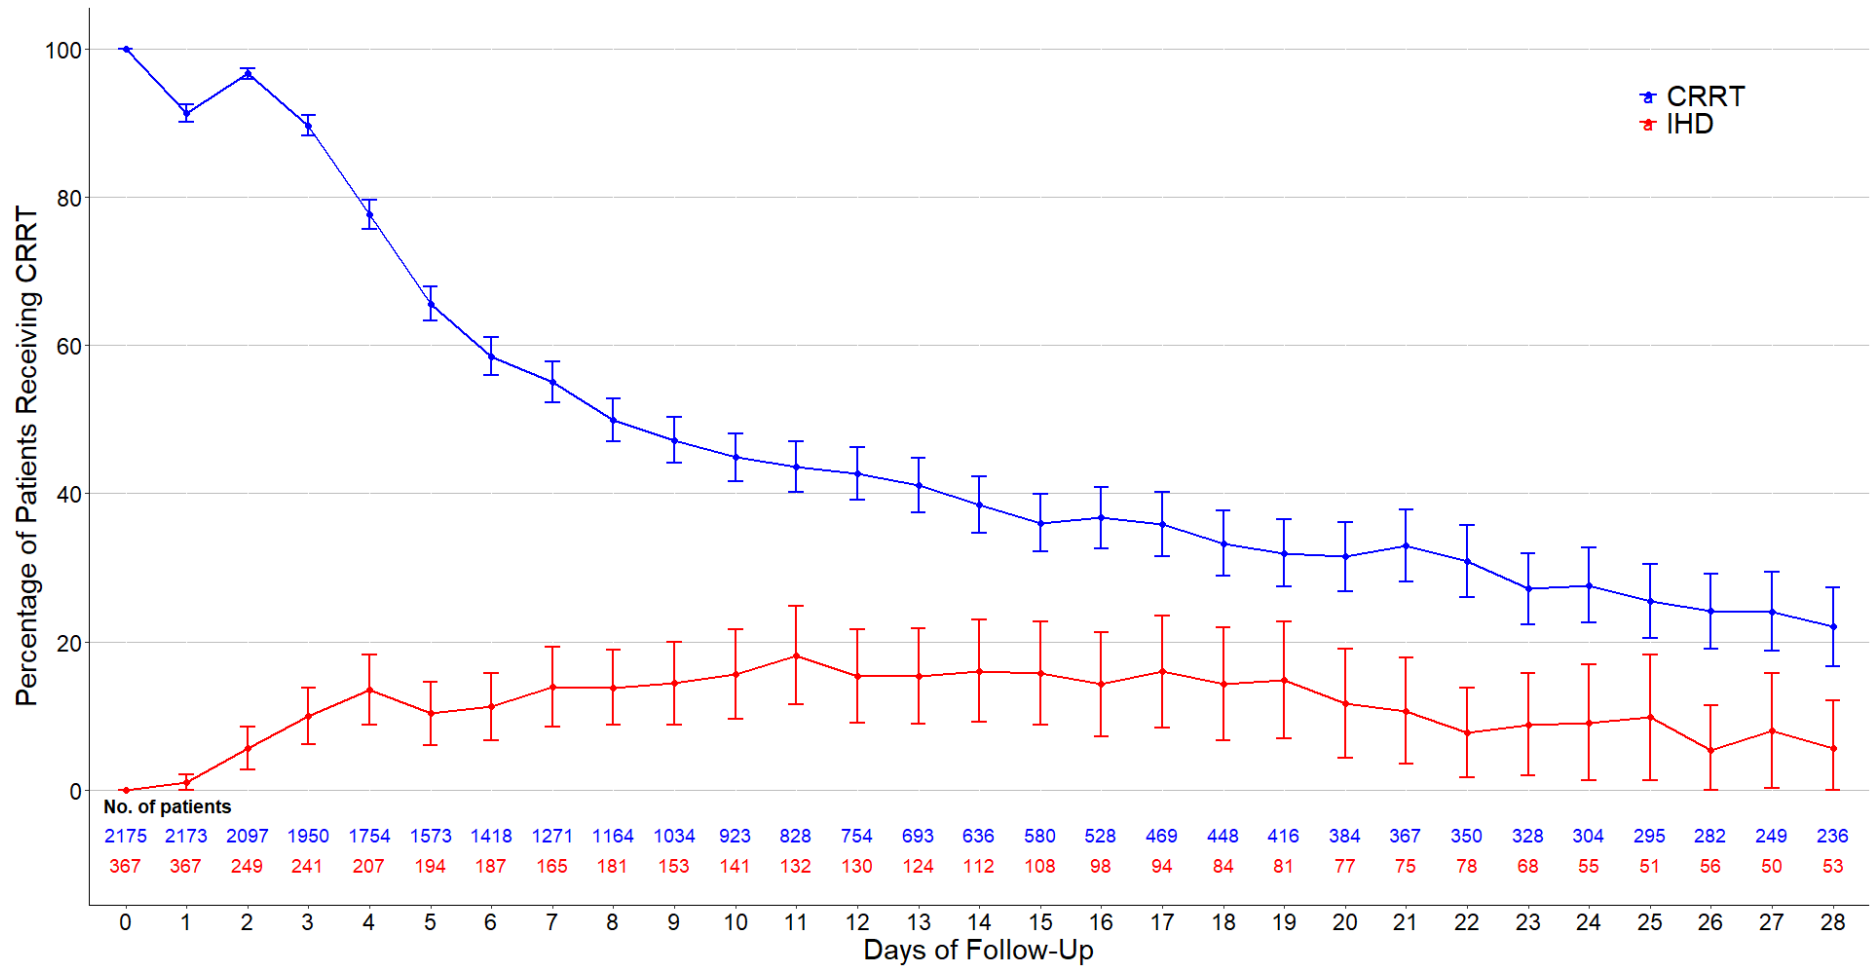

CRRT denotes continuous renal replacement therapy and IHD intermittent hemodialysis.

**eFigure 3 - Percentage of Patients Receiving Intermittent Hemodialysis Over the First 28 Days**

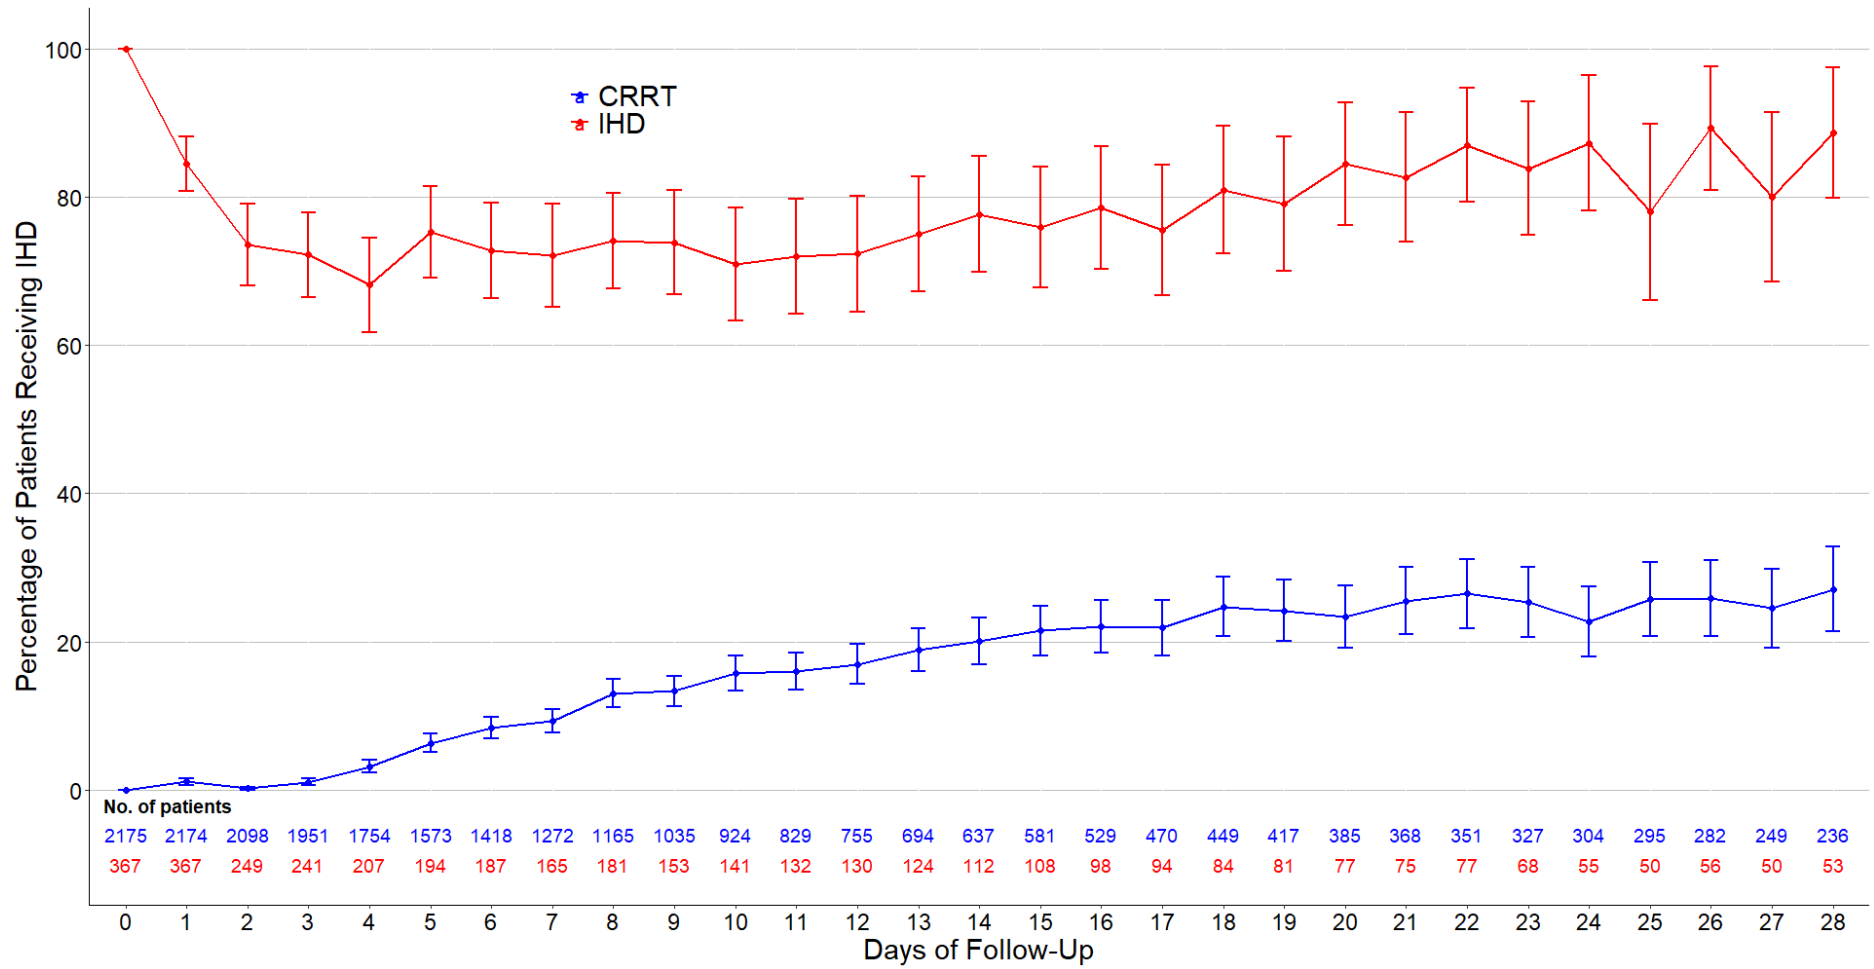

CRRT denotes continuous renal replacement therapy and IHD intermittent hemodialysis.

**Figure 4 - Percentage of Patients Receiving Continuous Renal Replacement Therapy or Intermittent Hemodialysis Over the First 28 Days among Patients Classified According to the Exclusive Modality Received in the First Three Days**

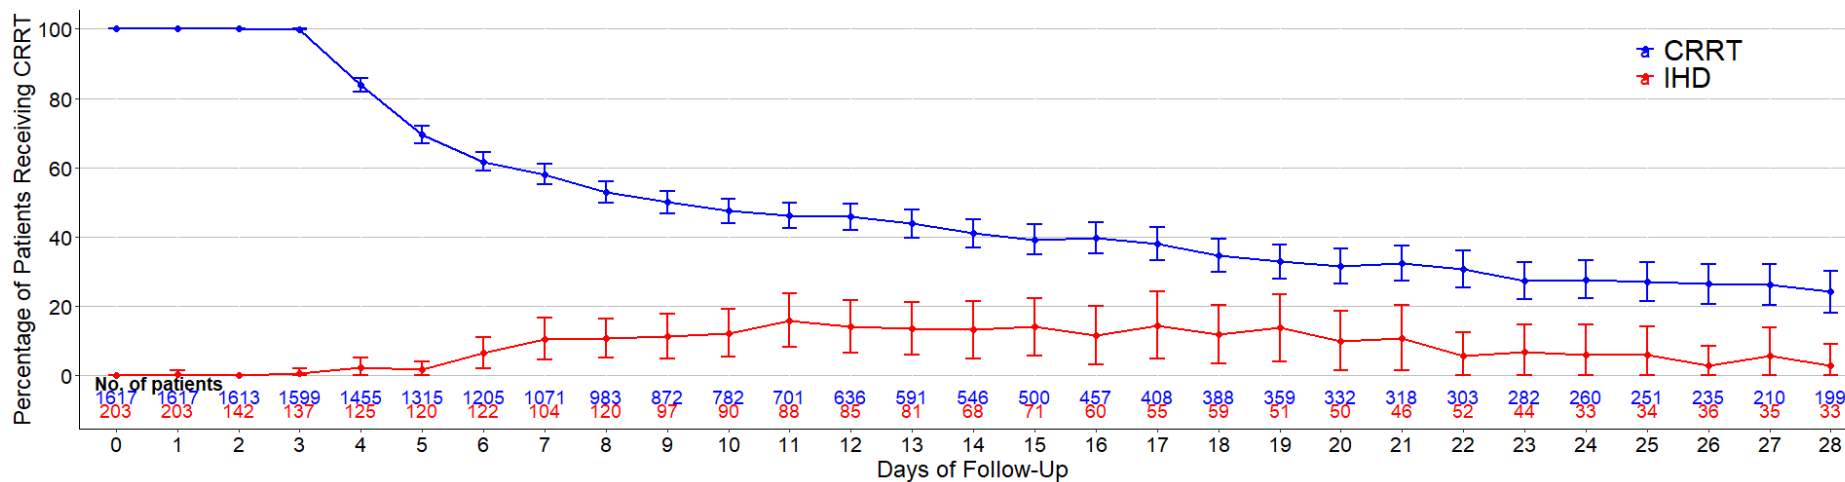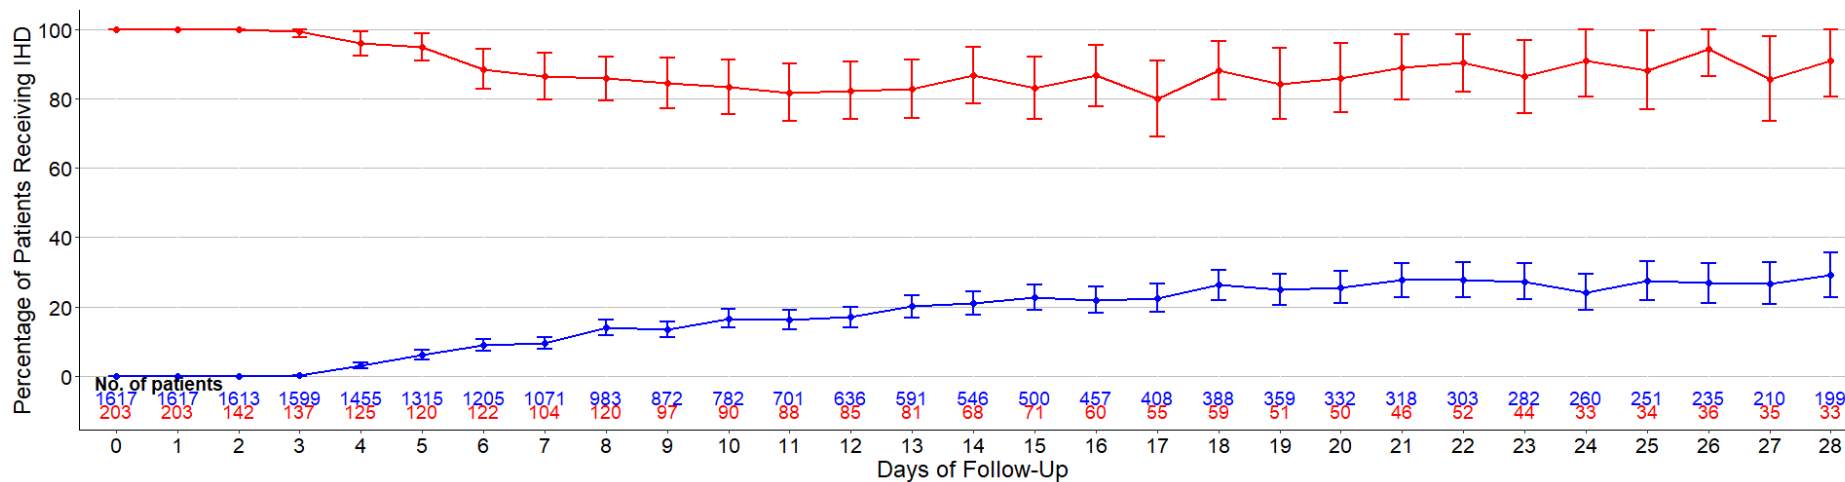

CRRT denotes continuous renal replacement therapy and IHD intermittent hemodialysis.

**Figure 5 - Percentage of Patients Receiving Continuous Renal Replacement Therapy or Intermittent Hemodialysis Over the First 28 Days among Patients Classified According to the Exclusive Modality Received in the Available Follow-Up**

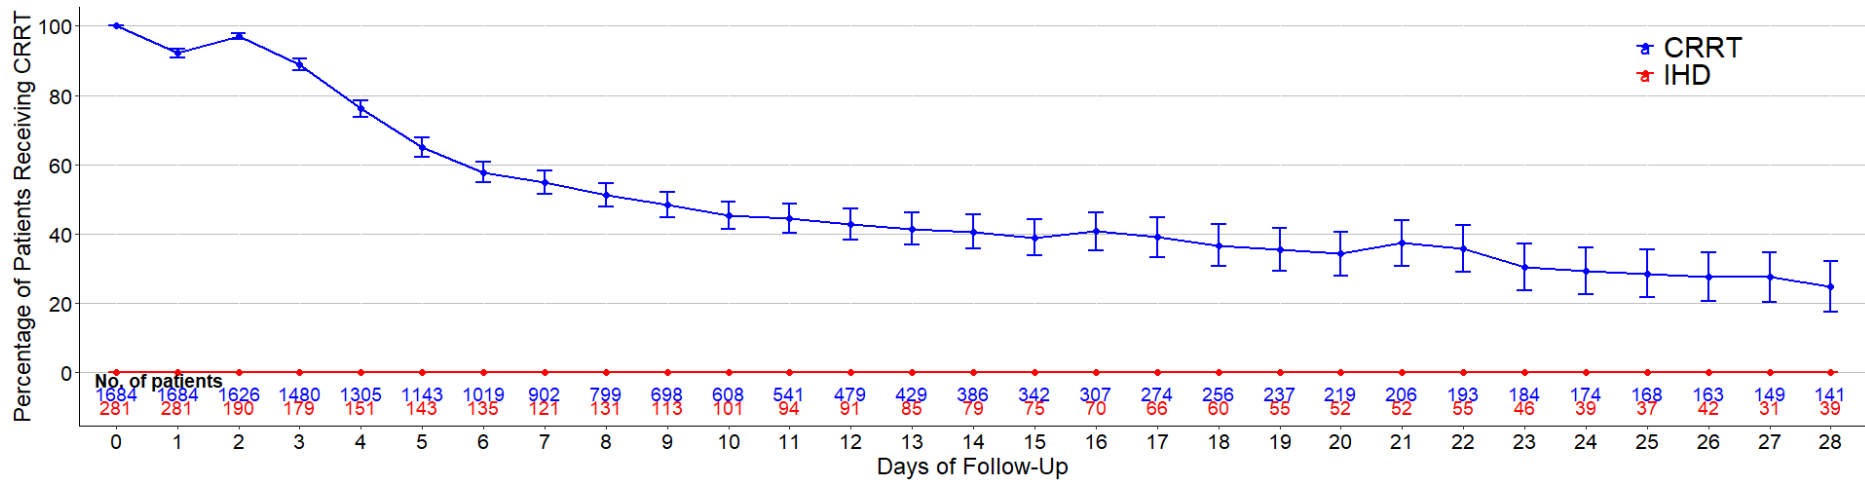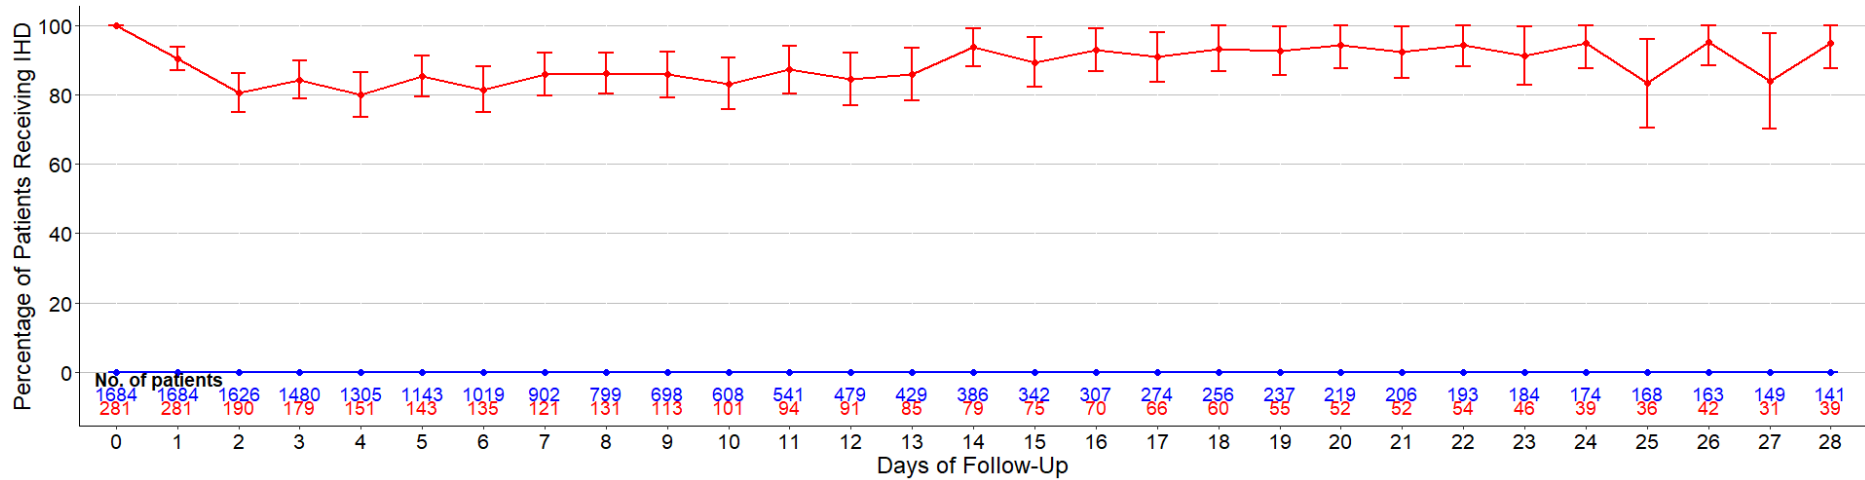

CRRT denotes continuous renal replacement therapy and IHD intermittent hemodialysis.



**eFigure 6. The relationship between IHD/CRRT time ratio and RRT dependence at day 28 after randomization**

**A) IHD/CRRT time ratio at 2 weeks**

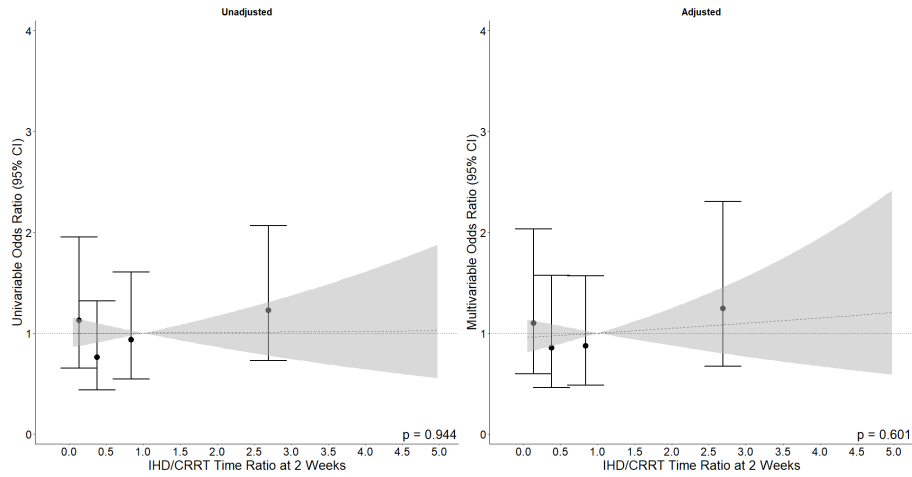

**B) IHD/CRRT time ratio at 3 weeks**

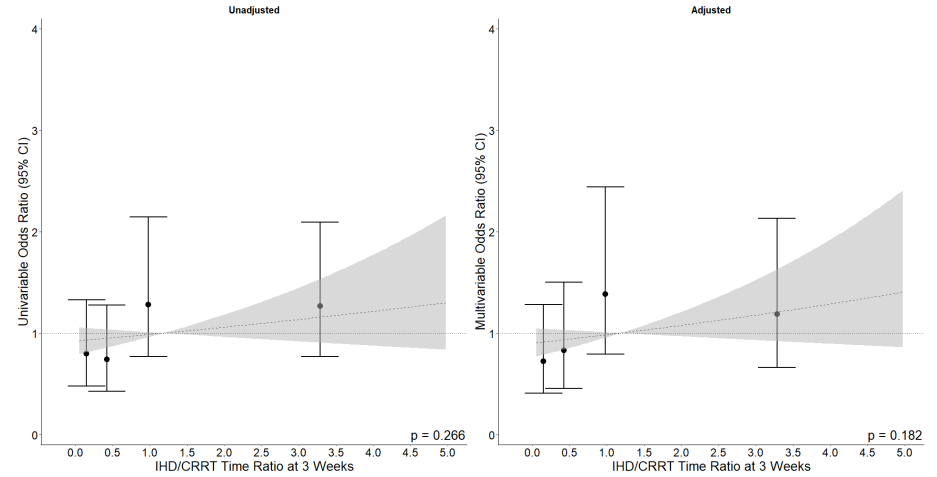

**C) IHD/CRRT time ratio at 4 weeks**

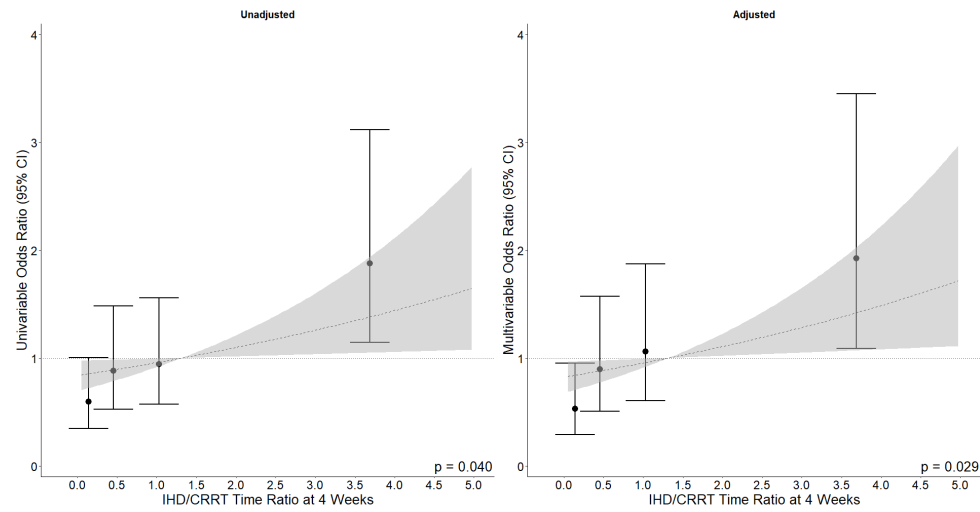

**eFigure 7: Use of IHD Among All Patients with CVS SOFA $\geq$ 3 at randomization**

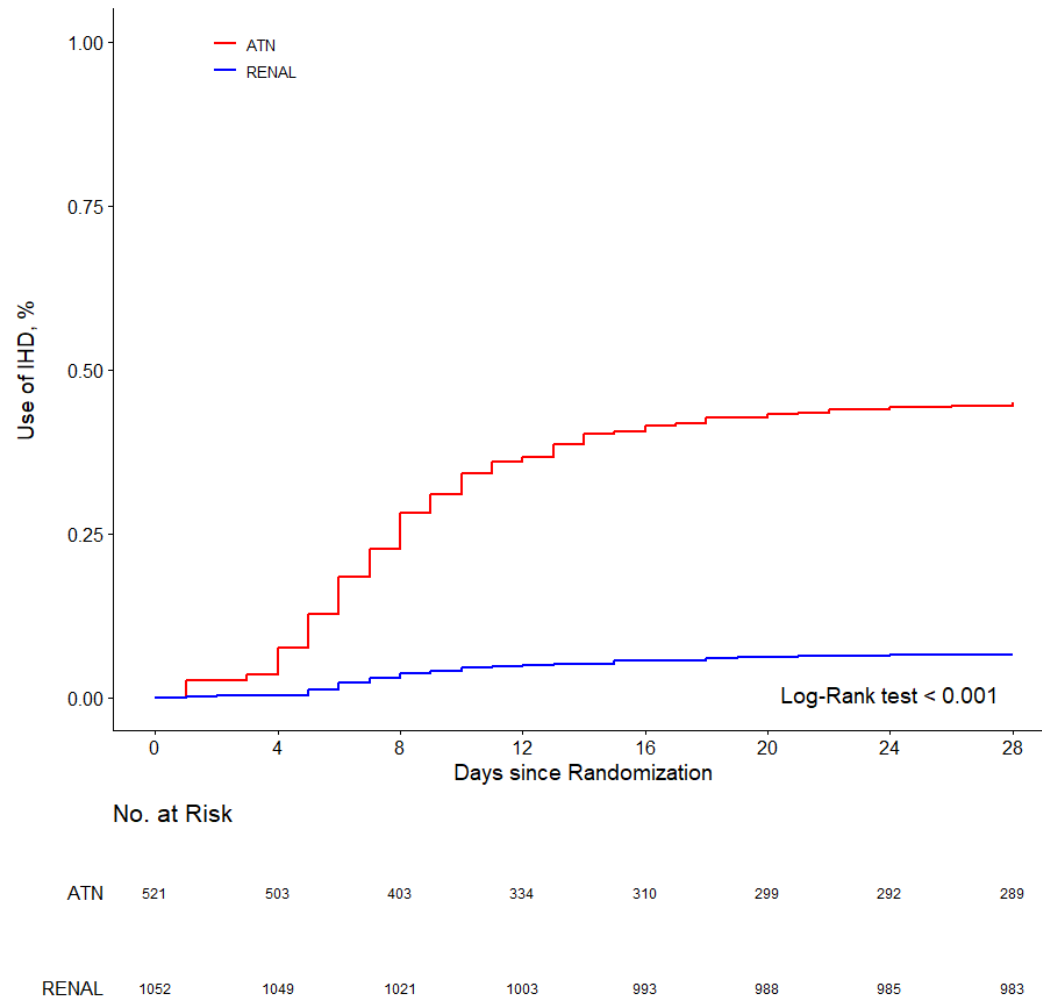

**eFigure 8: Use of IHD Among Survivors with CVS SOFA $\geq$ 3 at randomization**

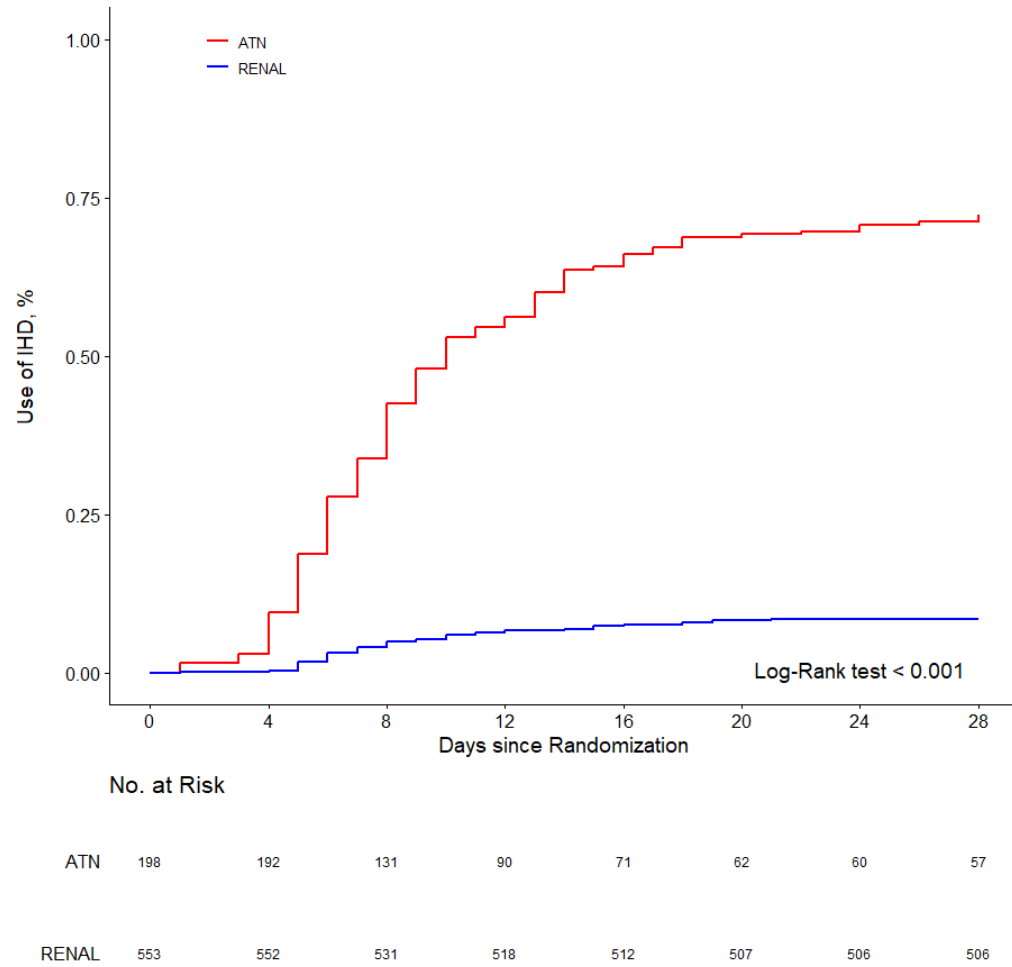

Supplement: MOESM1 [file 23459044]
